# Supplementary material for: Proteomic Analysis of Larval Midgut from the Silkworm (Bombyx mori)
Source: Hindawi journal article supplement (doi:10.1155/2011/876064), 2011-01-01
Supplement: f2 [file 876064.f2.pdf]

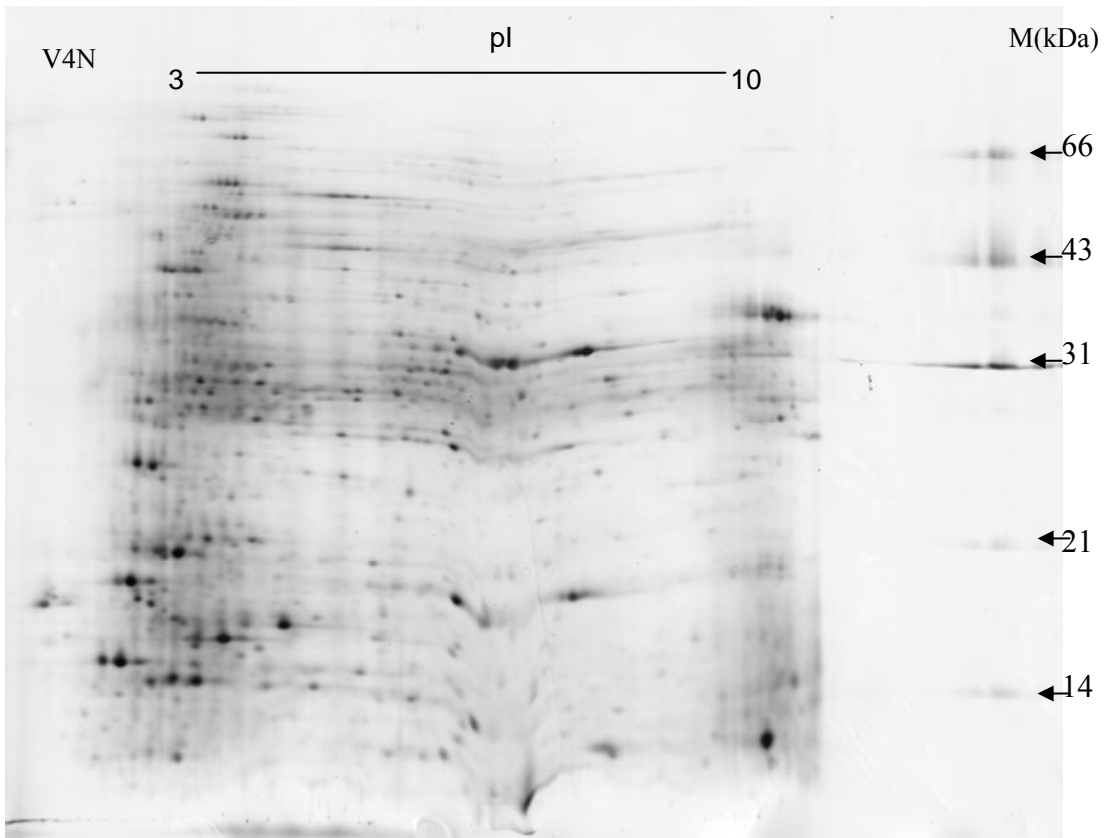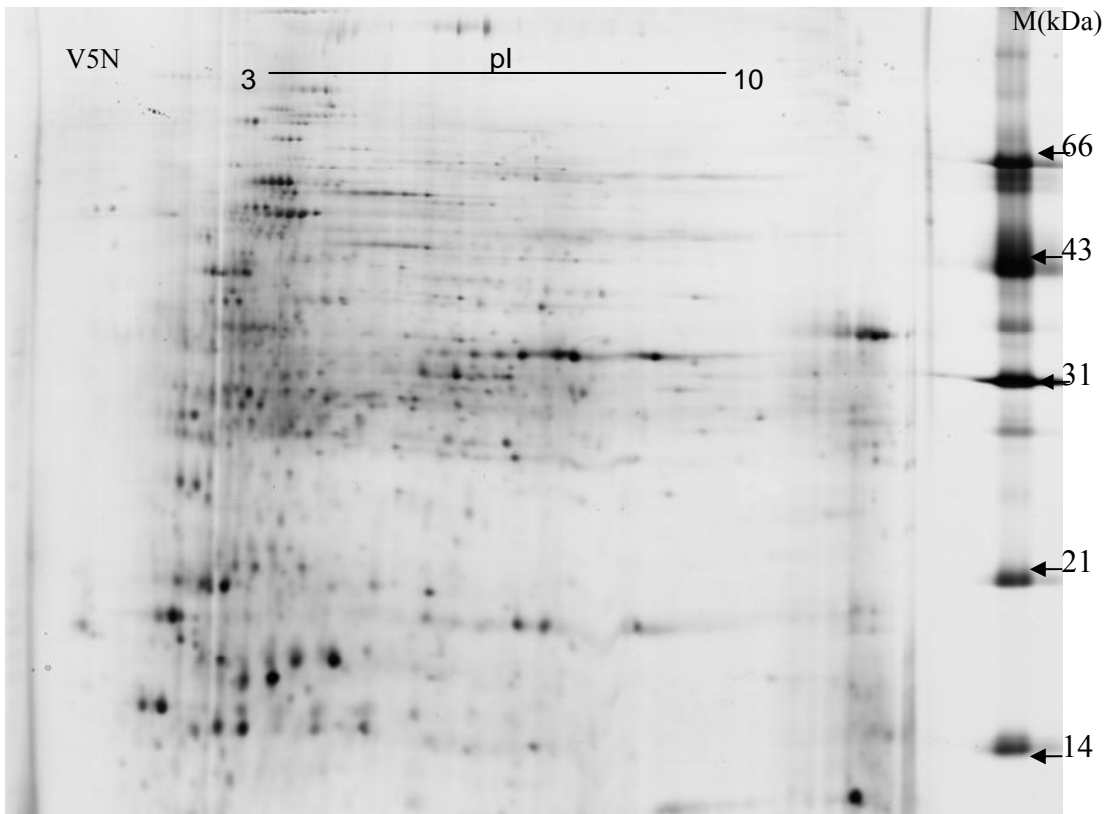

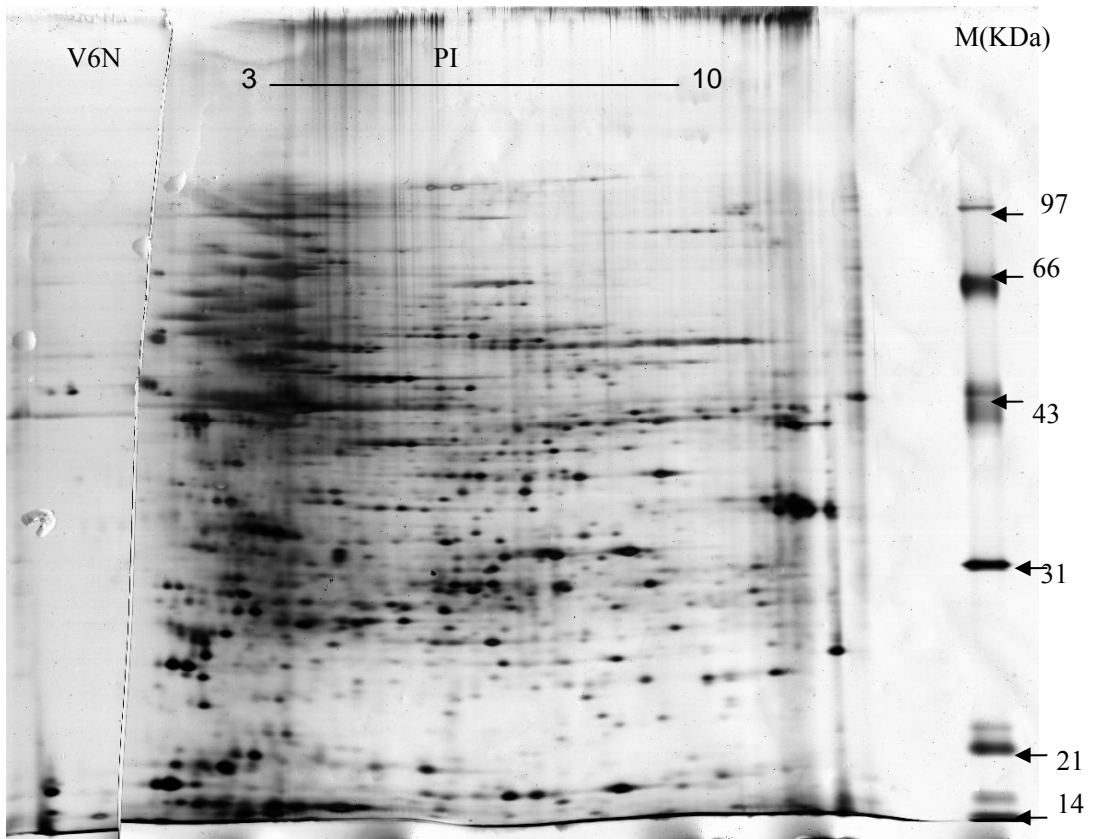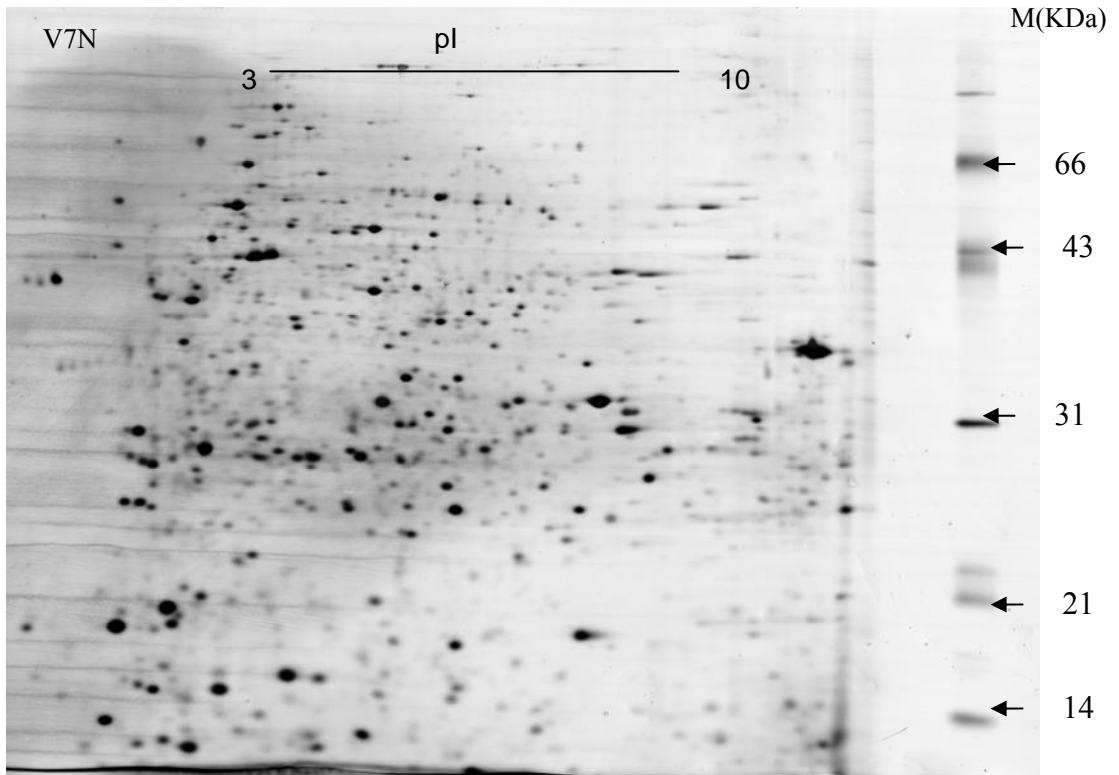

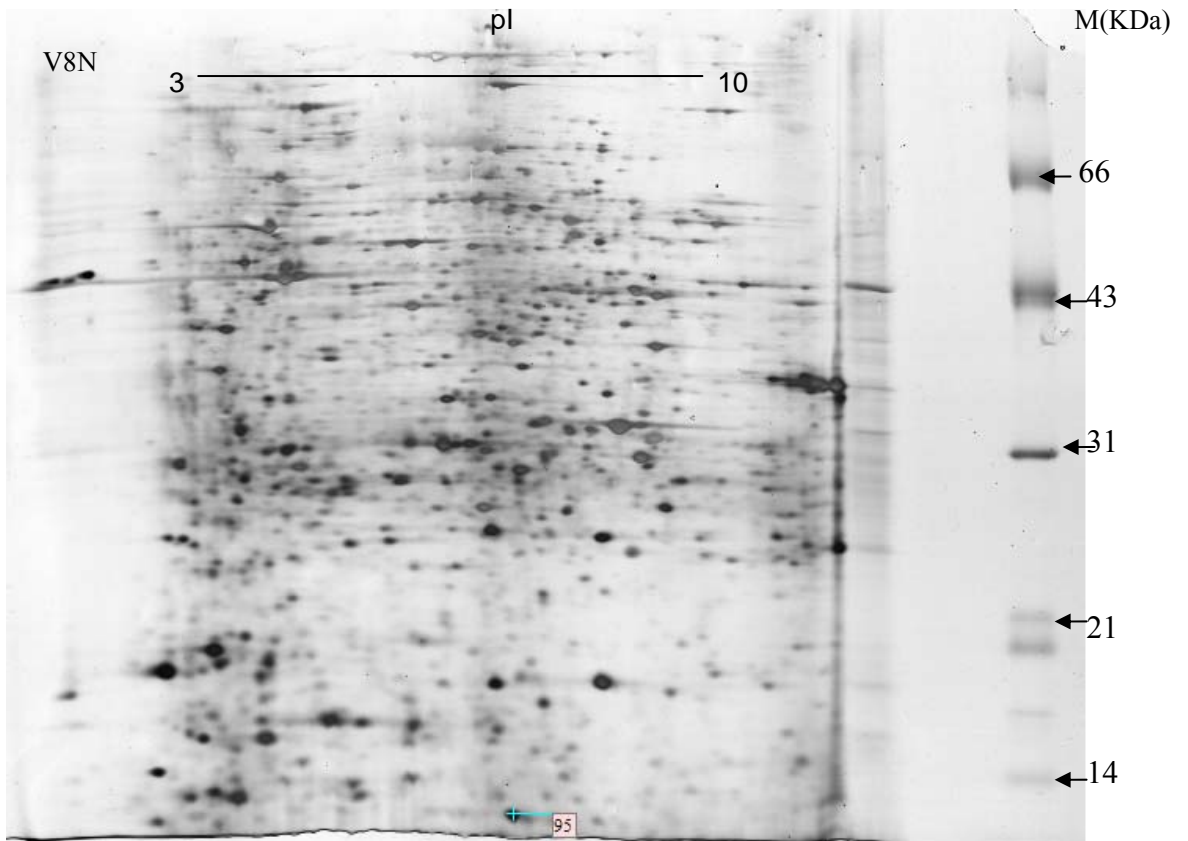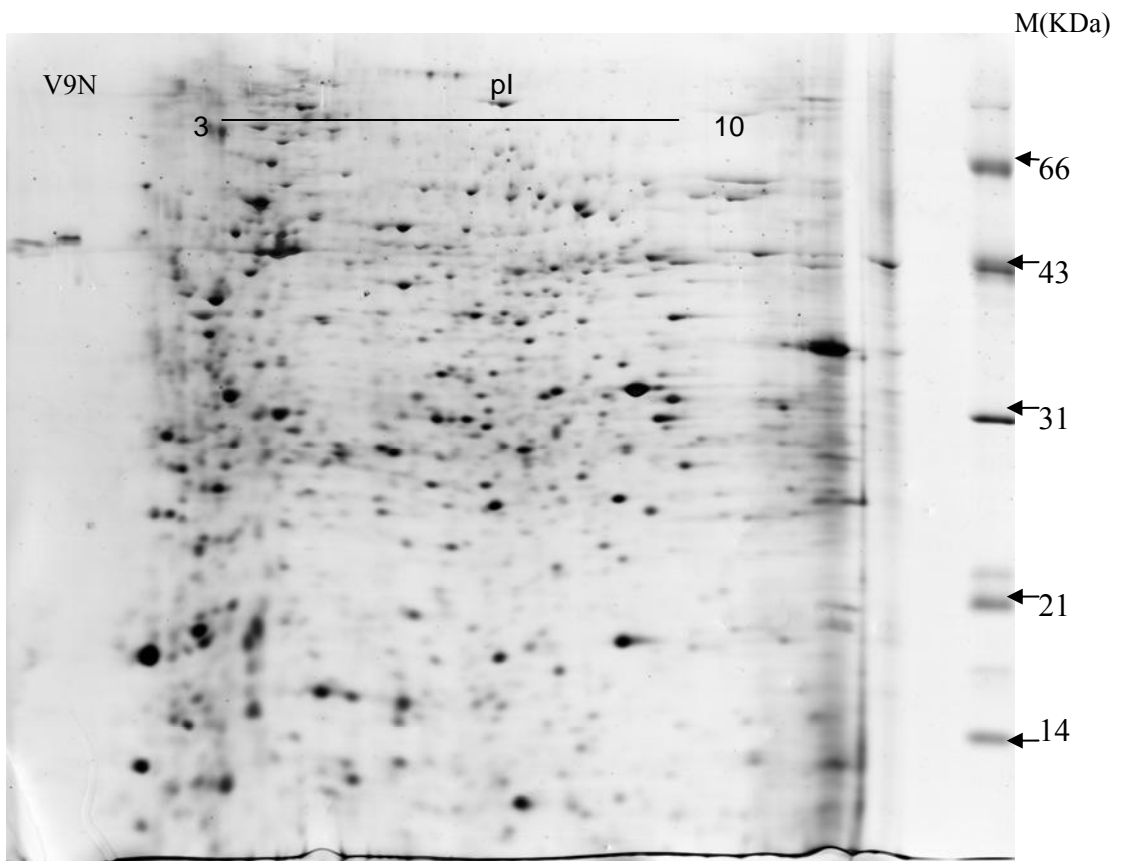

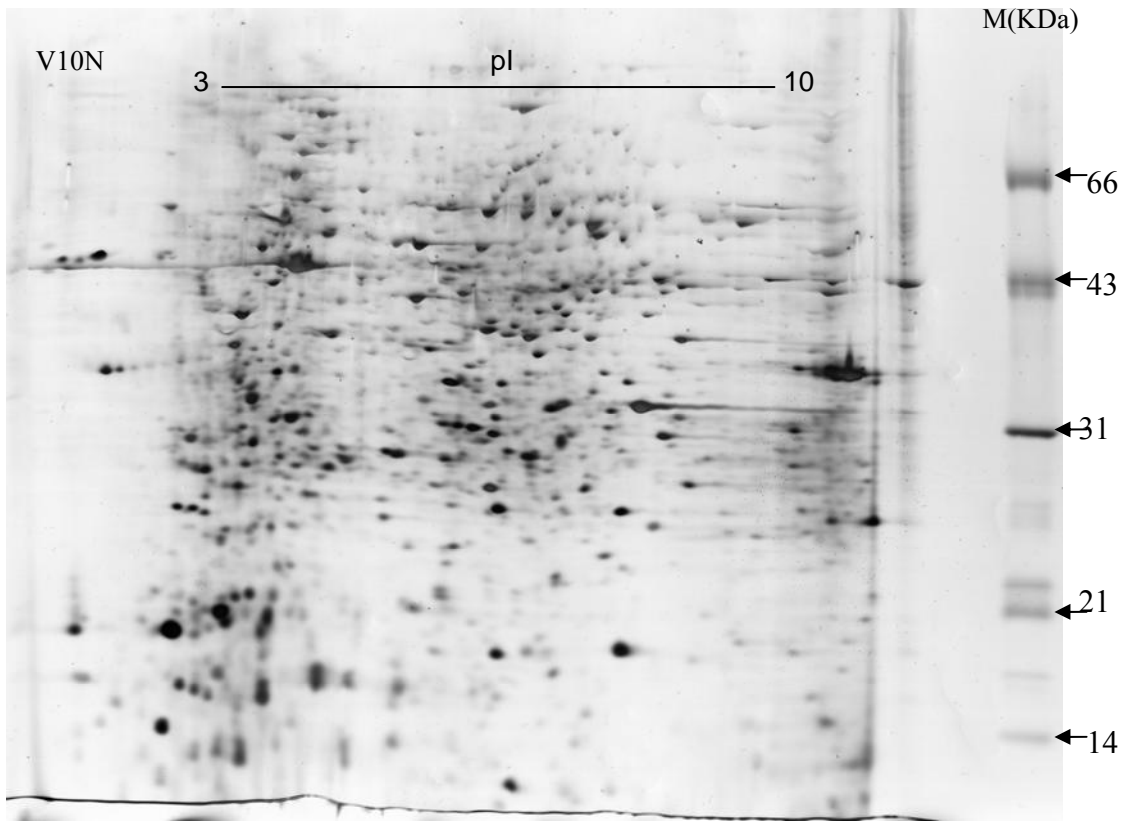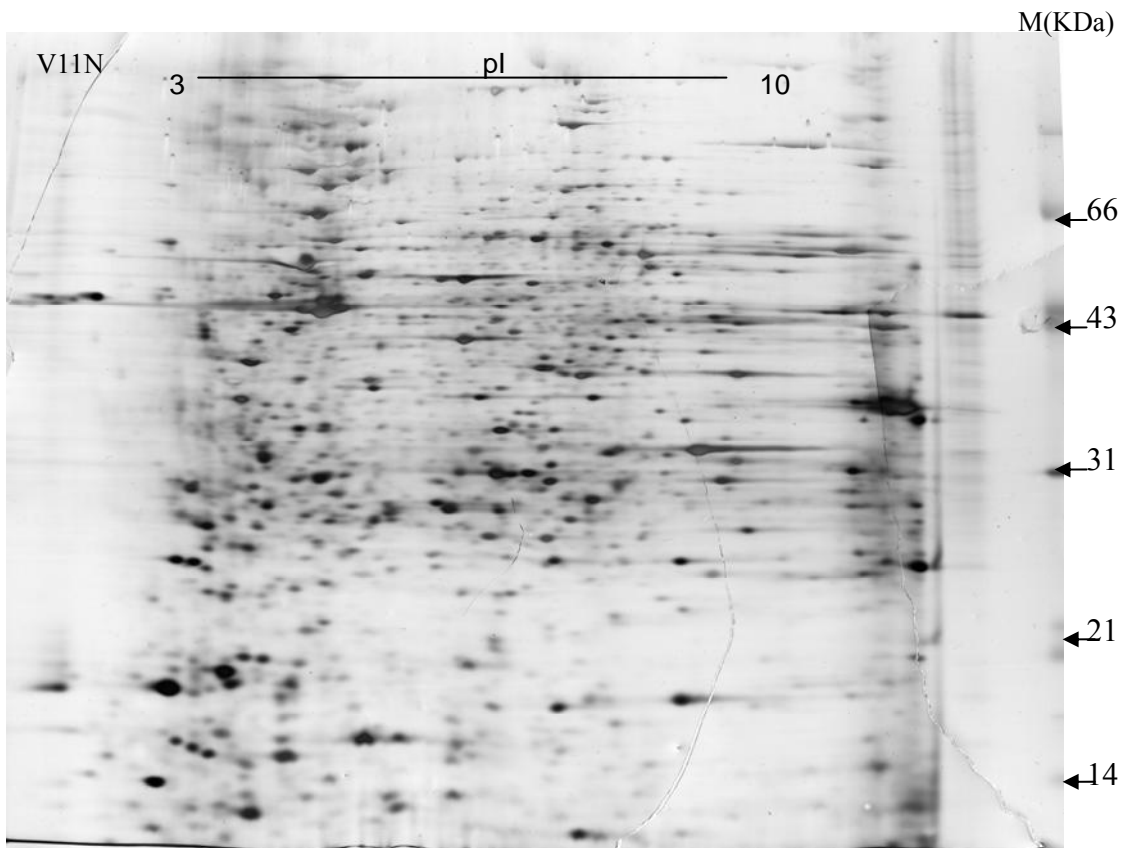

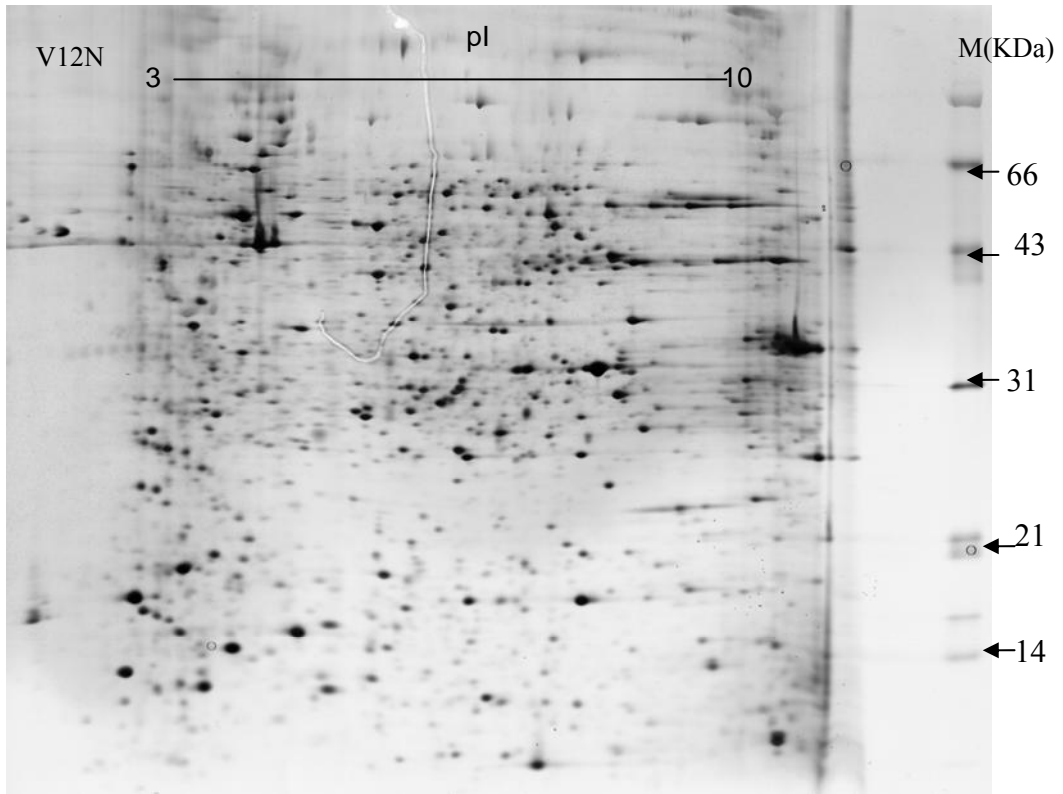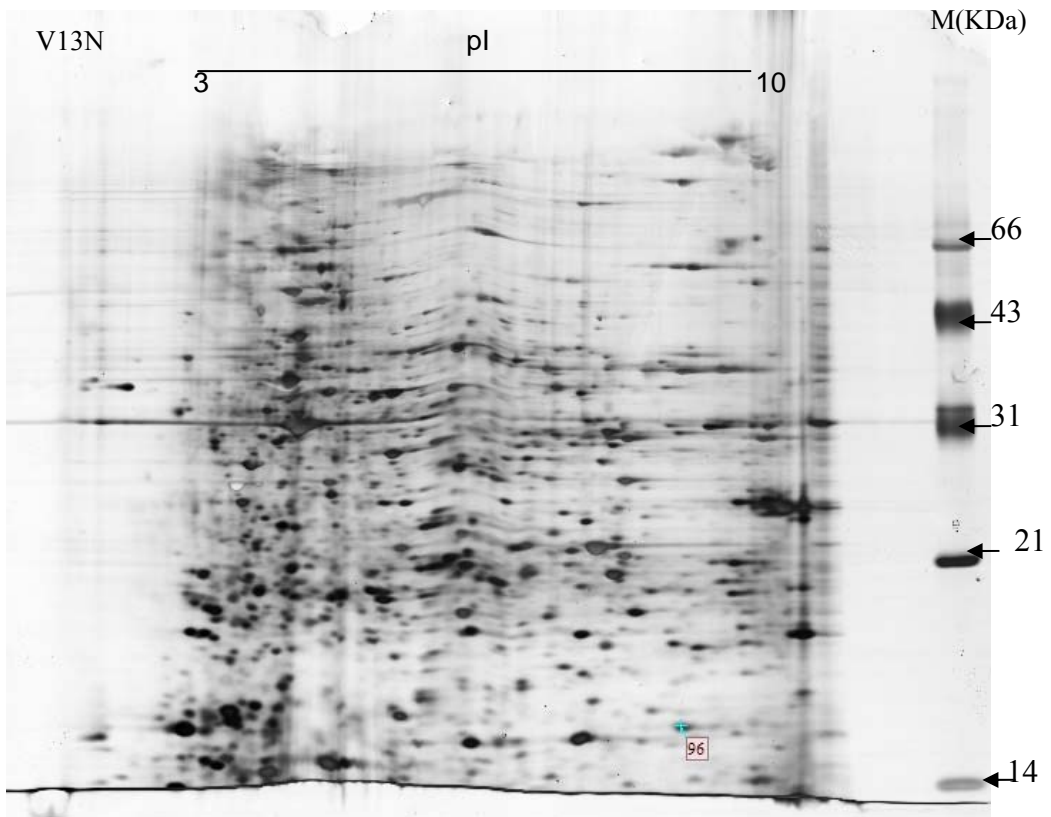

**Supplemental data 2** The 2-DE profiles of midgut proteins at the fifth instar larvae day 4 to day 13 in non-feeding silkworms. A total of 300 µg protein from each sample was applied onto a pH 3-10 immobiline drystrip (18cm) for the first-dimensional electrophoresis, and then separated by 12.5% SDS-PAGE. The 2-DE gels were silver-stained. Proteins identified in this study were indicated and the numbers corresponded to those in the table 1. VXN means fifth-instar day-x in non feeding silkworm larvae.
