# Supplementary material for: Proteomic Analysis of Larval Midgut from the Silkworm (Bombyx mori)
Source: Hindawi journal article supplement (doi:10.1155/2011/876064), 2011-01-01
Supplement: f3 [file 876064.f3.pdf]

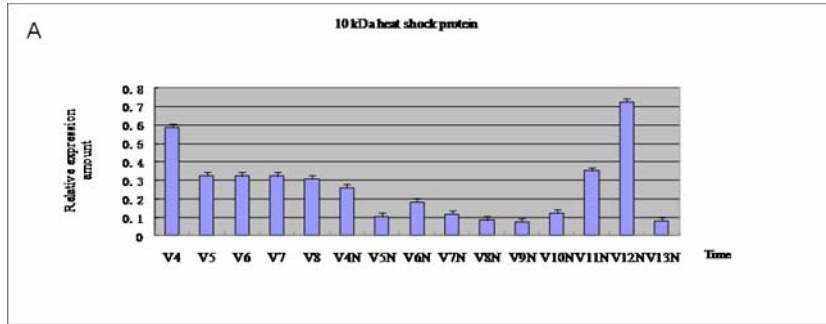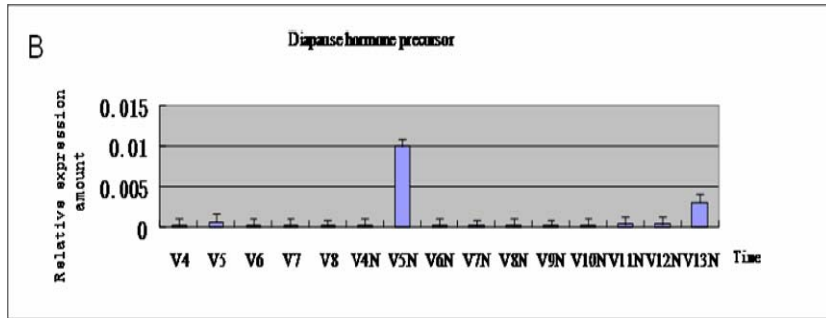

**Supplemental data 3** Real-time PCR results of 10 kDa heat shock protein gene (A) and diapause hormone precursor gene (B). The horizontal axis is different stages of normal feeding (V4-V8) and non-feeding larvae (V4N-V13N). Each bar represents the mean  $\pm$ SD (n=3).
